# Supplementary material
Source: PubMed Central journal article supplement (PMC6955311)
Supplement: pnas.1911123117.sapp.pdf [file pnas.1911123117.sapp.pdf]

**Supporting Information (SI)**

**Insights into the mechanism and regulation of the CbbQO-type Rubisco activase,  
a MoxR AAA+ ATPase**

Yi-Chin Candace Tsai<sup>1#</sup>, Fuzhou Ye<sup>1,2#</sup>, Lynette Liew<sup>1</sup>, Di Liu<sup>1</sup>, Shashi Bhushan<sup>1,2</sup>, Yong-Gui Gao<sup>1,2\*</sup> and Oliver Mueller-Cajar<sup>1,2\*</sup>

#: These authors contributed equally

<sup>1</sup>School of Biological Sciences, Nanyang Technological University, 60 Nanyang Drive,  
Singapore 637551

<sup>2</sup>NTU Institute of Structural Biology, Nanyang Technological University, 59 Nanyang Drive,  
Singapore, 636921

\*Correspondence should be addressed to O. M.-C. [cajar@ntu.edu.sg](mailto:cajar@ntu.edu.sg) or Y.G. [ygao@ntu.edu.sg](mailto:ygao@ntu.edu.sg)

**This PDF file includes:**

Figs. S1 to S5

Tables S1 to S2

**Other supplementary materials for this manuscript include the following:**

Dataset S1

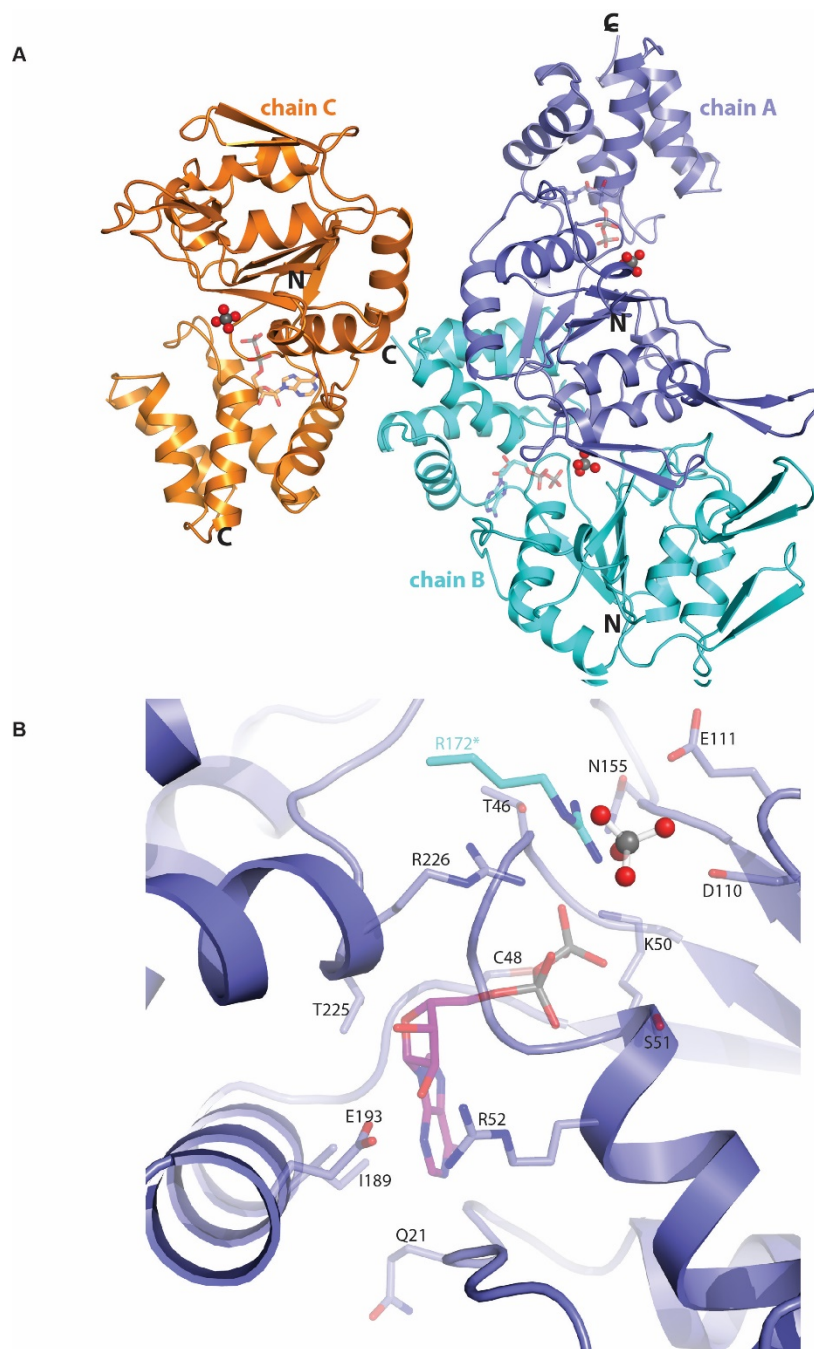

**Fig. S1. The crystal structure of CbbQ2.** (A) Three subunits (Chains A, B, C are colored slate, cyan and orange) in one ASU. ADP was colored in accordance with its subunit and shown as stick, Pi was shown as sphere. The atoms oxygen, nitrogen and phosphorus are displayed as red, blue and grey, respectively. (B) The active site of CbbQ2. Binding pocket of ADP-Pi, the residues interacting with ADP-Pi are shown as sticks, Pi is shown as ball-and-stick. R172 from the adjacent subunit was colored cyan. The atoms of nitrogen, oxygen and phosphorus are colored blue, red and grey, respectively.

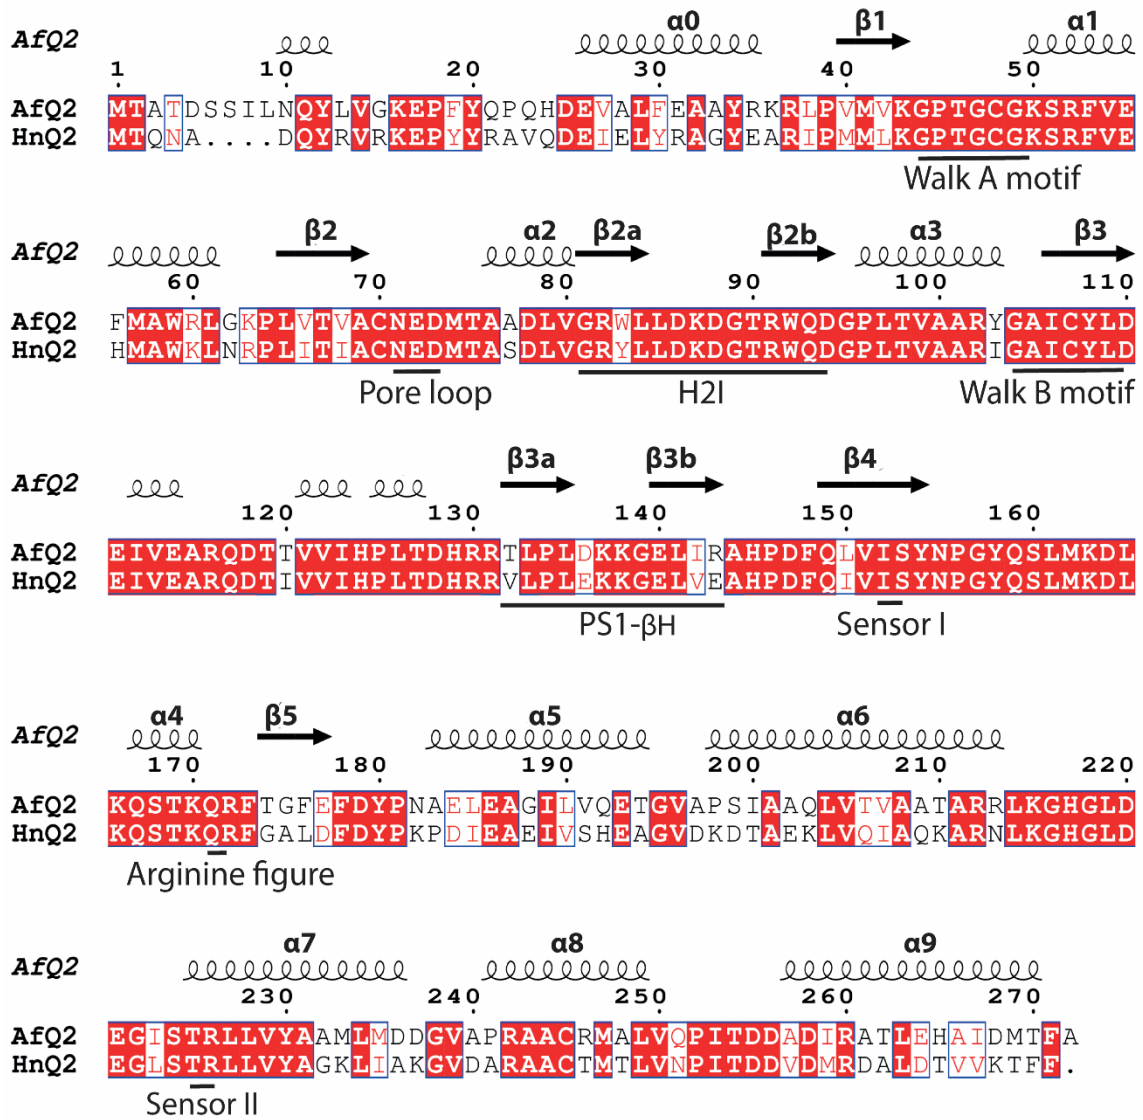

**Fig. S2.** Structure-based sequence alignment of CbbQ2 with *Hn* CbbQ (PDB code 5C3C) from *Halothiobacillus neapolitanus*.

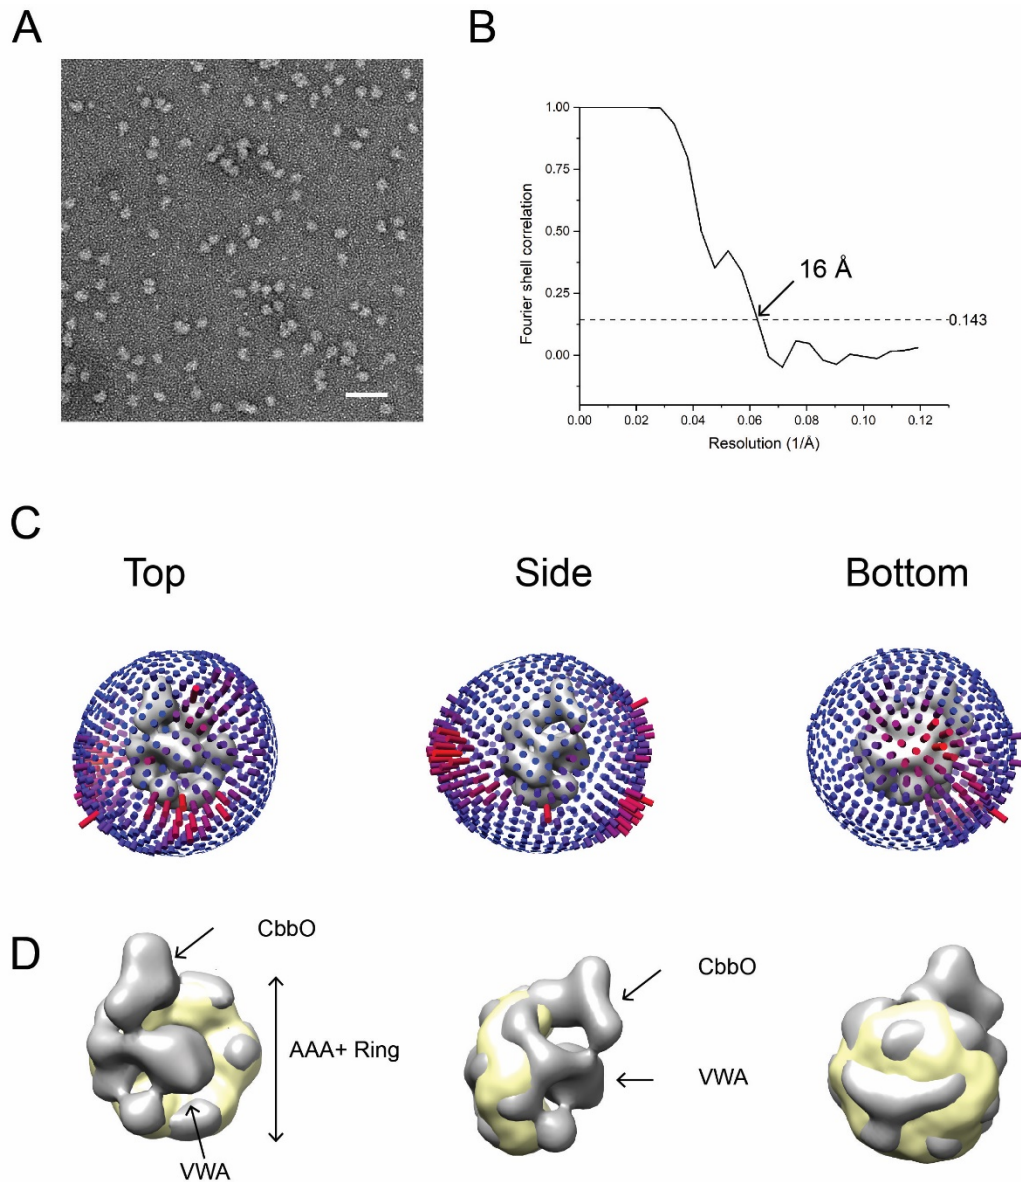

**Fig. S3. Electron microscopy of AfQ2O2.** (A) Representative micrograph of AfQ2O2 ( $0.05 \text{ mg ml}^{-1}$ ) in APO state. Scale bar, 50 nm. (B) Fourier shell correlation (FSC) curves of AfQ2O2 as determined by gold standard FSC procedure in Relion-3. (C) Angular distribution of the dataset. Each cylinder represents one view, and the height is scaled to the number of particles in that view. (D) 3D reconstruction of Q2O2 fit with the EM reconstruction of AfCbbQ2 in yellow (EMDB: EMD-6477), showing additional density on the concave face of the AAA+ ring attributed to CbbO2.

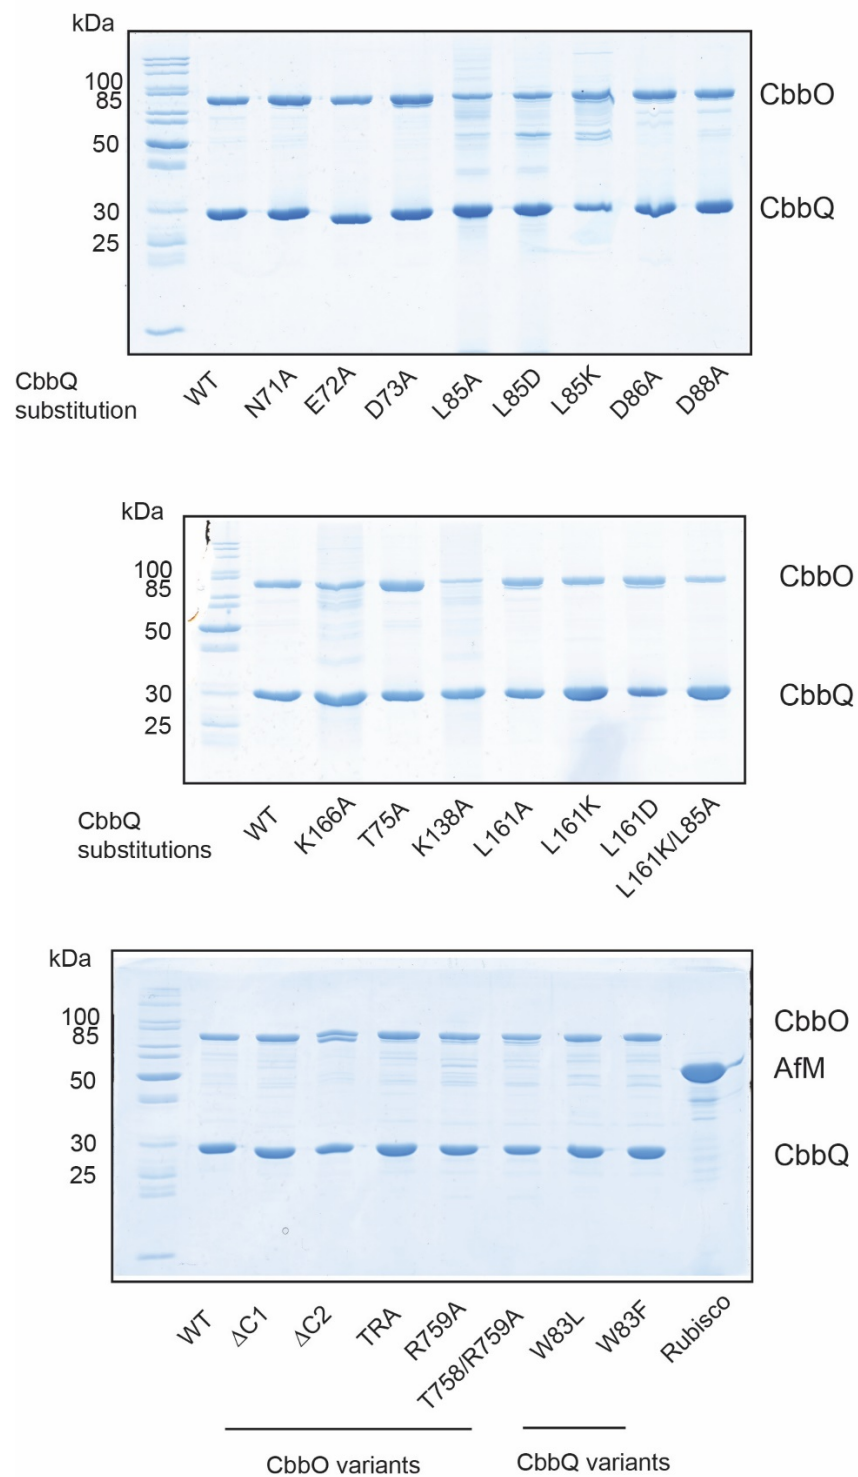

**Fig. S4. SDS-PAGE analysis of proteins used in this study.** 4  $\mu$ g of protein was loaded per lane.

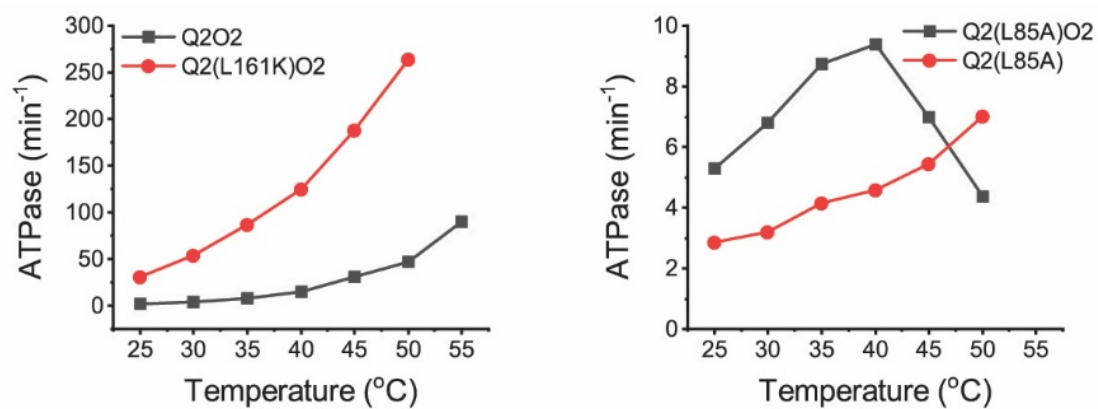

**Fig. S5. Temperature activity profiles of selected CbbQ and CbbQO proteins.** ATPase activity of the indicated complexes (0.27  $\mu$ M oligomer) was measured at different temperatures. The protein was preincubated at the target temperature for 10 minutes prior to assay.

**Table S1. Data collection for X-Ray crystallographic data.**

|                                          |                       |
|------------------------------------------|-----------------------|
| <b>Synchrotron beamline</b>              | NSRRC 13B1            |
| <b>Data collection</b>                   |                       |
| Space group                              | P6                    |
| Unit cell dimensions                     |                       |
| a,b,c (Å)                                | 167.75, 167.75, 48.29 |
| $\alpha,\beta,\gamma$ (°)                | 90, 90, 120           |
| Resolution (Å)                           | 30-2.2 (2.27-2.2)     |
| R <sub>merge</sub> (%)                   | 9.7 (36.4)            |
| R <sub>pim</sub> (%)                     | 4.6 (17.8)            |
| CC <sub>1/2</sub> (%)                    | 99.9(95.0)            |
| I/ $\sigma$ I                            | 16.1 (5.1)            |
| Completeness (%)                         | 99.9 (99.5)           |
| Redundancy                               | 10.5 (9.7)            |
| <b>Refinement</b>                        |                       |
| Resolution (Å)                           | 30-2.2                |
| R <sub>work</sub> /R <sub>free</sub> (%) | 19.4/23.8             |
| <b>Average B factor (Å<sup>2</sup>)</b>  |                       |
| Protein                                  | 38.0                  |
| Ligand                                   | 30.6                  |
| PO <sub>4</sub> <sup>3-</sup>            | 42.3                  |
| Water                                    | 34.9                  |
| <b>R.m.s.deviations</b>                  |                       |
| Bond length (Å)                          | 0.005                 |
| Bond angle (°)                           | 0.945                 |
| <b>Ramachandran plot</b>                 |                       |
| Favored regions (%)                      | 97.36                 |
| Allowed regions (%)                      | 2.51                  |
| Outlier (%)                              | 0.13                  |

\* Numbers in parenthesis refer to outer resolution shell

**Table S2. Mutagenic primers used in this study.**

| <b>Primer name</b>  | <b>Primer sequence (5' to 3')</b> |
|---------------------|-----------------------------------|
| AfQ2N71A_For        | ACCGTAGCCTGTGCAGAGGACATGACC       |
| AfQ2N71A_Rev        | GGTCATGTCCTCTGCACAGGCTACGGT       |
| AfQ2E72A_For        | TAGCCTGTAAACGCGGACATGACCGC        |
| AfQ2E72A_Rev        | GCGGTCATGTCCGCGTTACAGGCTA         |
| AfQ2D73A_For        | CCTGTAACGAGGCCATGACCGCCGC         |
| AfQ2D73A_Rev        | GCGGCGGTCATGGCCTCGTTACAGG         |
| AfQ2L85A_For        | GCCGCTGGCTGGCCGACAAGGACG          |
| AfQ2L85A_Rev        | CGTCCTTGTCGGCCAGCCAGCGGC          |
| AfQ2L85D_For        | GCCGCTGGCTGGATGACAAGGACGGT        |
| AfQ2L85D_Rev        | ACCGTCCTTGTCATCCAGCCAGCGGC        |
| AfQ2L85K_For        | GCCGCTGGCTGAAAGACAAGGACGGT        |
| AfQ2L85K_Rev        | ACCGTCCTTGTCCTTCAGCCAGCGGC        |
| AfQ2D86A_For        | GCTGGCTGCTCGCCAAGGACGGTAC         |
| AfQ2D86A_Rev        | GTACCGTCCTTGGCGAGCAGCCAGC         |
| AfQ2D88A_For        | TGCTCGACAAGGCAGGTACCCGTTGG        |
| AfQ2D88A_Rev        | CCAACGGGTACCTGCCTTGTCGAGCA        |
| AfQ2K166A_For       | CTGATGAAGGATCTCGCGCAATCCACCAAGCA  |
| AfQ2K166A_Rev       | TGCTTGGTGGATTGCGCGAGATCCTTCATCAG  |
| AfQ2T75A_For        | CTAACGAGGACATGGCCGCCGCGGAT        |
| AfQ2T75A_Rev        | ATCGGGCGGCGGCCATGTCCTCGTTAG       |
| AfQ2K138A_For       | CCGCTGGACAAGGCGGGCGAACTGATC       |
| AfQ2K138A_Rev       | GATCAGTTCGCCCGCCTTGTCAGCGG        |
| AfQ2L161A_For       | GCTATCAGTCGGCGATGAAGGATCT         |
| AfQ2L161A_Rev       | AGATCCTTCATCGCCGACTGATAGC         |
| AfQ2L161K_For       | GGCTATCAGTCGAAAATGAAGGATCTC       |
| AfQ2L161K_Rev       | GAGATCCTTCATTTTCGACTGATAGCC       |
| AfQ2L161D_For       | GCTATCAGTCGGATATGAAGGATCT         |
| AfQ2L161D_Rev       | AGATCCTTCATATCCGACTGATAGC         |
| AfO2ΔC1_For         | ATCGCCCTGACCTAATAAAGCTTGGCT       |
| AfO2ΔC1_Rev         | AGCCAAGCTTTATTAGGTCAGGGCGAT       |
| AfO2ΔC2_For         | TTCATCGCCCTGTAACGGTAAAGCTTG       |
| AfO2ΔC2_Rev         | CAAGCTTTACCGTTACAGGGCGATGAA       |
| AfO2TRA_For         | GCCCTGACCCGGGCATAAAGCTTGGCT       |
| AfO2TRA_Rev         | AGCCAAGCTTTATGCCCGGGTCAGGGC       |
| AfO2R759A_For       | ATCGCCCTGACCGCATAAAGCTTGGCT       |
| AfO2R759A_Rev       | AGCCAAGCTTTATGCGGTCAGGGCGAT       |
| AfO2T758A/R759A_For | TTCATCGCCCTGGCAGCATAAAGCTTGGCT    |
| AfO2T758A/R759A_Rev | AGCCAAGCTTTATGCTGCCAGGGCGATGAA    |
